# Supplementary material for: An efficient method for regioselective ring opening of epoxides by amines under microwave irradiation using Bi(NO3)3·5H2O as a catalyst
Source: Royal Society of Chemistry journal article supplement (doi:10.1039/c6nj03701a), 2017-01-01
Supplement: c6nj03701a1.pdf [file c6nj03701a1.pdf]

## Supplementary Information

### An efficient method for regioselective ring opening of epoxides by amines under microwave irradiation using $\text{Bi}(\text{NO}_3)_3 \cdot 5\text{H}_2\text{O}$ as catalyst

Shobha Bansal, Yogendra Kumar, Parveen Pippal, Dipak K. Das, Panchanan Pramanik and Prabal P. Singh\*

Department of Chemistry, GLA University, 17 km stone, NH-2 Delhi-Mathura Highway, Chaumuhan, Mathura UP 281406, India

| SNo. | Content                                      | Page no. |
|------|----------------------------------------------|----------|
| 1    | HPLC Spectrum                                | S2       |
| 2    | FTIR of Bismuth nitrate(III)pentahydrate     | S3       |
| 3    | FTIR of dehydrated solvated Bismuth nitrate  | S4       |
| 4    | Analytical data of compounds                 | S5-S8    |
| 5    | $^1\text{H}$ and $^{13}\text{C}$ NMR-Spectra | S9-S22   |

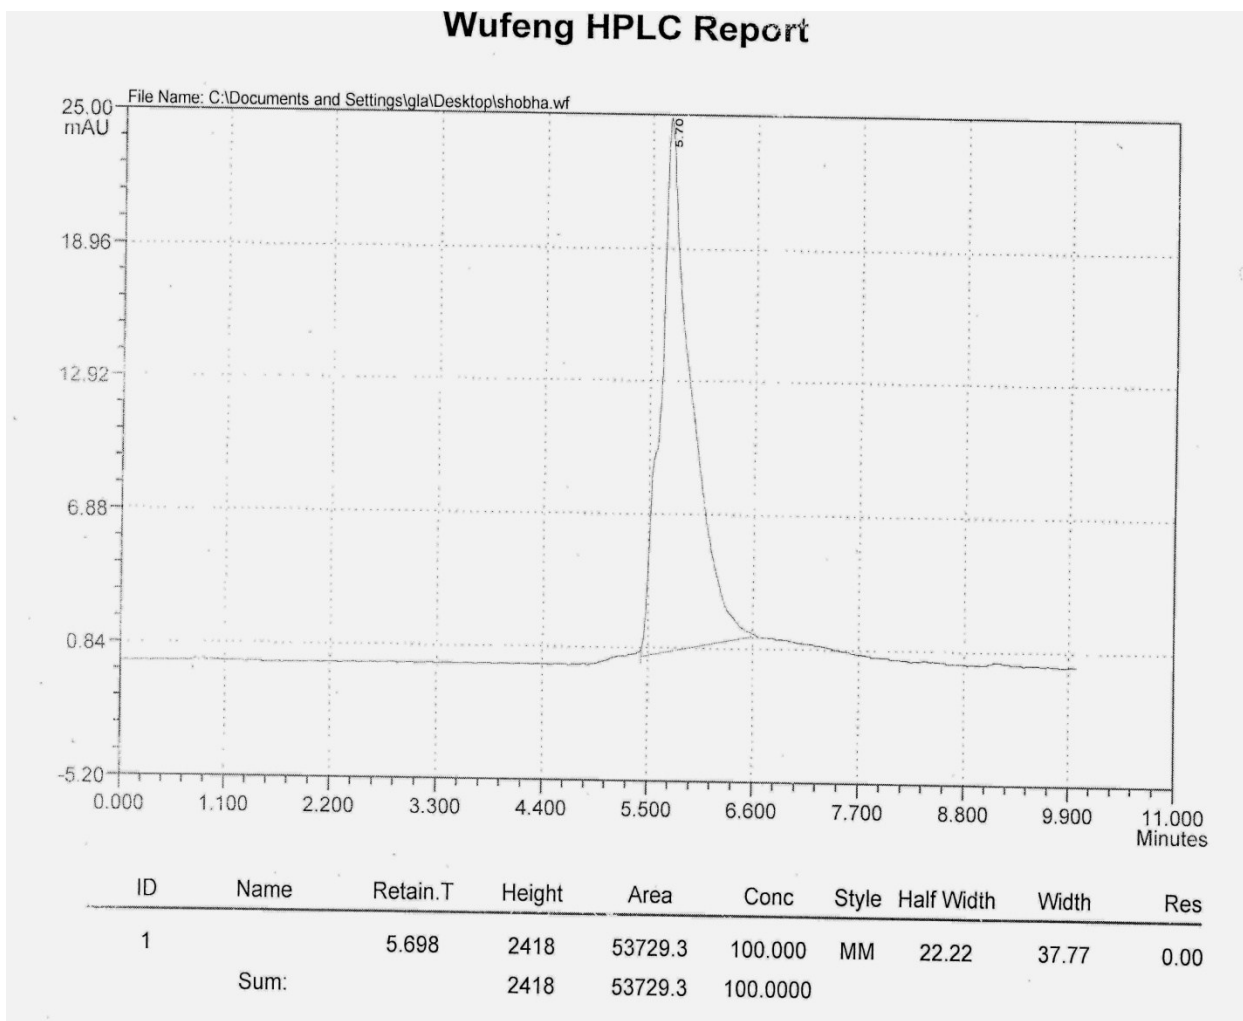

Figure S1. HPLC spectrum of 2-(1H-imidazol-1-yl)-2-phenylethanol) Scheme

3

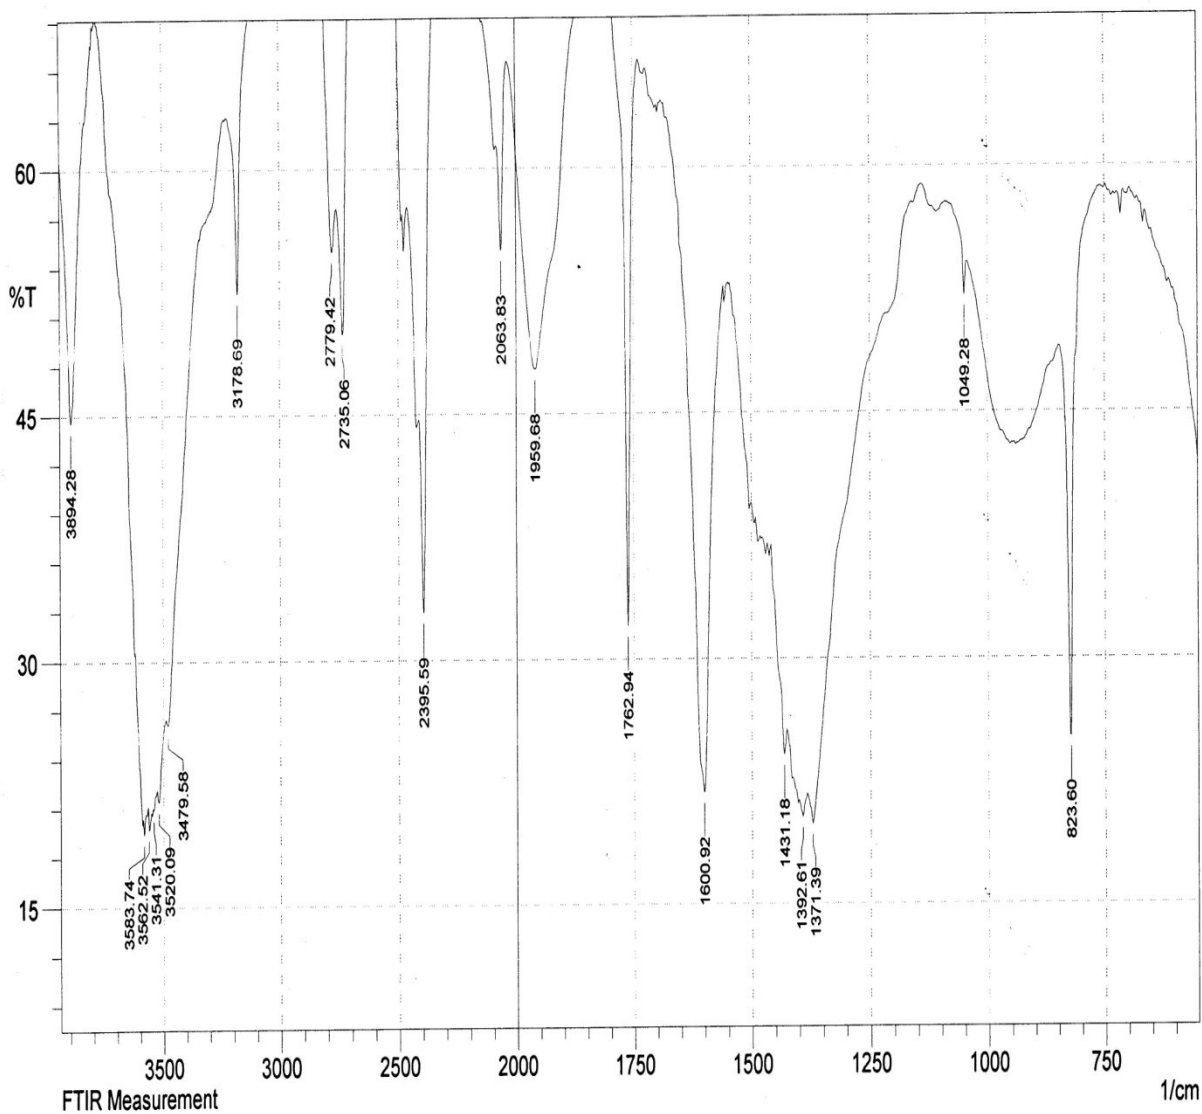

Figure S2. FTIR spectrum of Bismuth(III)nitrate pentahydrate

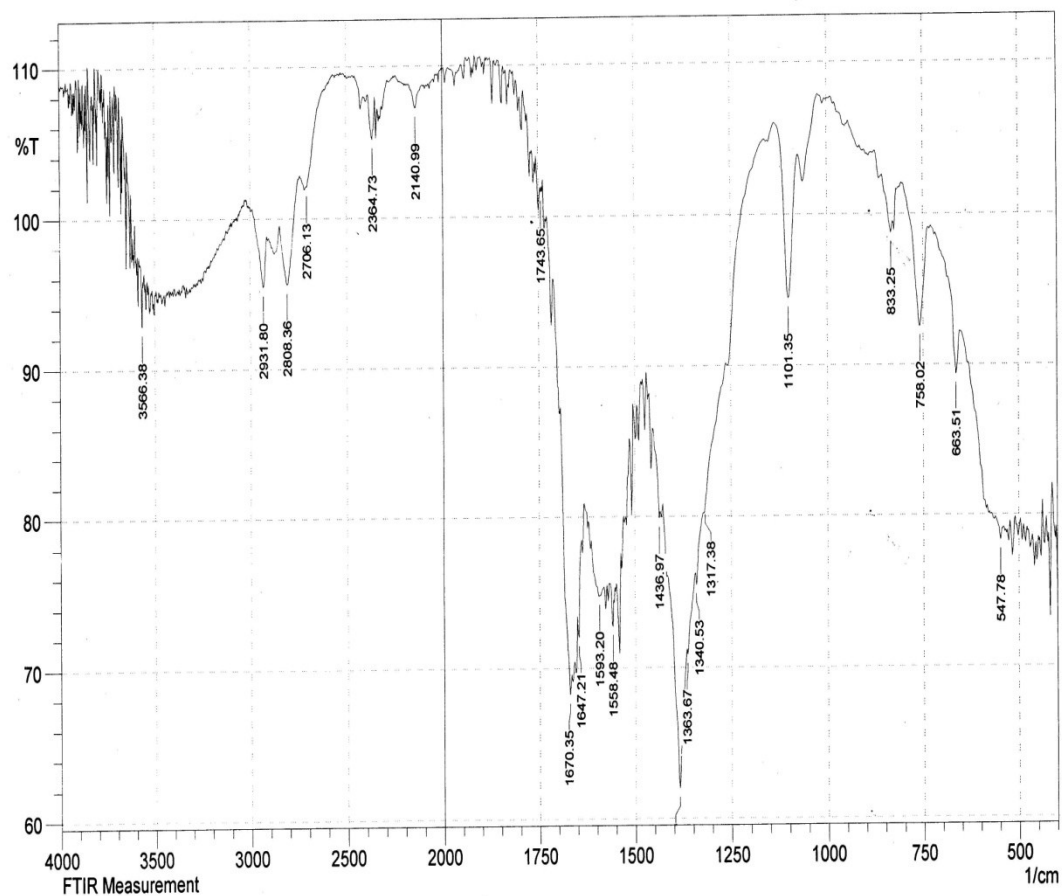

Figure S3. FTIR spectrum of Bismuth nitrate dehydrated (water molecule replaced by DMF molecule)

*(2-phenyl-2-(phenylamino)ethanol)*, (Table 4, entry 1) Colourless Liquid,  $R_f$  = 0.46 (2:8 EtOAc/hexane); IR (KBr  $\text{cm}^{-1}$ ): 2932, 2878, 2402, 1949, 1453, 1361, 1216, 1066, 1028, 926, 756.  $^1\text{H}$  NMR (300 MHz,  $\text{CDCl}_3$ ): 7.39-7.05(m, 5H, ArH); 7.12-7.05(m, 2H); 6.60(t,  $J=8.7\text{Hz}$ , 1H); 6.50(d,  $J=8.7\text{Hz}$ , 1H); 4.48(dd,  $J=4.2\text{Hz}, 7.2\text{Hz}$ , 1H); 3.92(dd,  $J = 4.2, 11.1\text{Hz}$ , 1H); 3.74(dd,  $J = 6.9\text{Hz}, 11\text{Hz}$ , 1H).  $^{13}\text{C}$  NMR (75 MHz,  $\text{CDCl}_3$ ): 147.2, 140.2, 129.4, 127.8, 126.9, 126.0, 118.2, 114.2, 67.4. Mass ESI  $m/z$  (%)  $M^{++1}=214$ ; 196(90%).

*2-(4-methylpiperazine-1-yl)-2-phenylethanol* (Table 4, entry 2) Liquid,  $R_f$  = 0.35 (2:8 EtOAc/hexane); IR(KBr,  $\text{cm}^{-1}$ ): 3787, 2944, 2805, 1363, 1215, 1060, 928, 702.  $^1\text{H}$  NMR (300 MHz,  $\text{CDCl}_3$ ): 7.28(m, 5H, Ar); 3.95(t, 1H); 3.65(m, 2H,  $\text{CH}_2$ ); 2.7(s, -OH); 2.50(m,  $-\text{CH}_2$ ); 2.31(s,  $\text{CH}_3$ )  $^{13}\text{C}$  NMR (75MHz,  $\text{CDCl}_3$ ): 142, 136, 127, 68, 66, 60, 55, 49, 45. Mass ESI  $m/z$  (%)  $M^{++} + \text{CH}_3\text{COOH} = 281$ .

*(2-phenyl-2-(pyrrolidin-1-yl)ethanol)*, (Table 4, entry 3) Viscous Liquid,  $R_f$  = 0.56 (4:6 EtOAc/hexane);  $^1\text{H}$  NMR (300 MHz,  $\text{CDCl}_3$ ): 7.42-7.23(m, 3H); 3.93-3.81(dd, 1H); 3.23 (brs, -OH, 1H); 2.87-2.81(dd, 1H); 2.64-2.52(dd, 1H); 2.04-1.71(m, 2H).  $^{13}\text{C}$  NMR (75 MHz,  $\text{CDCl}_3$ ): 142.5, 138.7, 128.7, 128.2, 126.8, 70.7, 70.2, 64.3, 54.1, 51.6, 23.8, 23.3. Mass ESI  $m/z$  (%)  $M^{++1} = 192$ .

*2-(4-methylpiperidin-1-yl)2-phenylethanol* (Table 4, entry 4) Liquid,  $R_f=0.38$  (2:8 EtOAc/hexane);  $^1\text{H}$  NMR (300 MHz,  $\text{CDCl}_3$ ): 7.27(m, 5H, ArH); 4.7(1H, dd,  $J=4.2, 9.9$ , -CH) ; 3.12(s, -OH); 2.65(t, 2H,  $-\text{CH}_2$ ); 2.38(t, 2H,  $-\text{CH}_2$ ); 2.0(t, 2H,  $-\text{CH}_2$ ); 1.28( $-\text{CH}_2$ ); 0.90(s,  $-\text{CH}_3$ ).  $^{13}\text{C}$  NMR (75MHz,  $\text{CDCl}_3$ ): 142.2, 128.4, 127.9, 126.8, 70.1, 63.9, 46.4, 34.7, 30.9, 22.0. Mass ESI  $m/z$  (%)  $M^{++} = 220$

(2-(diisopropylamino)-2-phenylethanol) (Table 4, entry 5) viscous liquid,  $R_f = 0.46$  (1:9 EtOAc/hexane);  $^1\text{H}$  NMR (300 MHz,  $\text{CDCl}_3$ ): 7.4-7.2(m, 5H, Ar); 4.7(dd,  $J=2.7\text{Hz}, 7.8\text{Hz}$  1H); 3.7-3.3(m, 3H).  $^{13}\text{C}$  NMR (75MHz,  $\text{CDCl}_3$ ): 140.7, 139.1, 138.1, 128.6, 128.3, 127.8, 126.8, 126.2, 84.6, 83.1, 79.4, 68.4, 67.2. Mass ESI  $m/z$  (%)  $M^+ + \text{AcOH} = 281$ ,  $M^+ = 221$  (100%).

(2-(dipropylamino)-2-phenylethanol) (Table 4, entry 6) Liquid,  $R_f = 0.55$  (4:6 EtOAc/hexane); IR(KBr,  $\text{cm}^{-1}$ ): 3399, 2962, 2401, 1390, 1216, 1029, 757, 669.  $^1\text{H}$  NMR (300 MHz,  $\text{CDCl}_3$ ): 7.2(m, 5H, ArH); 4.5(brs, OH); 3.9(t, CH); 3.61(dd,  $J=2.7$ , 2H); 2.5(m,  $-\text{CH}_2$ ); 2.20(m,  $-\text{CH}_2$ ); 1.56(m,  $-\text{CH}_3$ ).  $^{13}\text{C}$  NMR (75MHz,  $\text{CDCl}_3$ ): 142.6, 127.9, 69.4, 64.1, 60.5, 56.2, 51.8, 21.0, 12.0; Mass ESI  $m/z$  (%)  $M^{+1} = 222$ .

(2-(naphthalene-1-ylamino)-2-phenylethanol), (Table 4, entry 7) Liquid,  $R_f = 0.70$  (1:4 EtOAc/hexane); IR (KBr,  $\text{cm}^{-1}$ ): 3410, 3018, 2931, 2402, 1583, 1479, 1407, 1283, 1216, 1067, 759.  $^1\text{H}$  NMR (300 MHz,  $\text{CDCl}_3$ ): 8.0-8.3(m, 1H, ArH); 7.75-7.79 (m, 1H, ArH); 7.12-7.50(m, 12H, ArH, NH); 6.36(d, 1H,  $J=8.4\text{Hz}$ ); 4.65 (1H, dd,  $J=4.2\text{Hz}-6.9\text{Hz}$ , 1H); 4.05(dd,  $J=4.2\text{Hz}, 11\text{Hz}$ , 1H); 3.87(dd,  $J=6.9\text{Hz}, 10.9\text{Hz}$ , 1H); 3.45(s, 1H,  $-\text{OH}$ ).  $^{13}\text{C}$  NMR (75MHz,  $\text{CDCl}_3$ ): 142.3, 140.0, 134.4, 128.9, 127.8, 127.2, 126.8, 126.6, 125.9, 125.0, 124.0, 120.2, 118.0, 106.7, 67.7, 60.1. Mass ESI  $m/z$  (%)  $M^{+1} = 264$ .

(2-phenyl-2-(o-tolylamino)ethanol). (Table 4, entry 8) Thick viscous liquid,  $R_f =$   $^1\text{H}$  NMR (300 MHz,  $\text{CDCl}_3$ ): 7.22-7.36(m, 5H, ArH); 7.05(d,  $J=7.8\text{Hz}$ , 1H); 6.9(t,  $J=16.8\text{Hz}$ , 1H); 6.6(t,  $J=15.6\text{Hz}$ , 1H); 6.37(d,  $J=7.8\text{Hz}$ , 1H); 4.5(dd,  $J=4.2\text{Hz}, 7.2\text{Hz}$ , 1H); 3.9(dd,  $J=4.2\text{Hz}, 6\text{Hz}$ , 1H), 3.7(dd,  $J=6.9\text{Hz}, 12\text{Hz}$ , 1H); 2.2(s, 3H); 2.0(brs, 1H, OH).  $^{13}\text{C}$  NMR (75MHz,  $\text{CDCl}_3$ ): 144.9, 140.1, 130.3, 129.0, 127.8,

127.1, 126.9, 122.9, 117.9, 112.0, 67.5, 60.2, 17.8; Mass ESI m/z (%)  $M^+ = 108$ ;  $M^{+2} = 110$ .

(*2-(butyl(methyl)amino)-2-phenylethanol*). (Table 4, entry 9) Thick viscous liquid,  $R_f = 0.41$  (1:9 EtOAc/hexane);  $^1\text{H}$  NMR (300 MHz,  $\text{CDCl}_3$ ): 7.28(m, 5H, ArH); 3.94(t, 1H); 3.78(d, 2H); 3.65(dd,  $J=3.6\text{Hz}, 9\text{Hz}$ , 2H); 3.27(s, -OH); 2.43(m, 2H); 2.16(s, 3H).  $^{13}\text{C}$  NMR (75MHz,  $\text{CDCl}_3$ ): 142.5, 131.2, 126.0, 69.1, 60.6, 57.7, 41.9, 29.5, 20.6, 14.2; Mass ESI m/z (%)  $M^+ + 1 = 208$ .

(*1-chloro-3-(phenylamino)propan-2-ol*). (Table 4, entry 10) Light Yellow solid, mp  $69^\circ\text{-}70^\circ\text{C}$ ; IR (KBr,  $\text{cm}^{-1}$ ): 3523, 3388, 3267, 3055, 1436, 1255, 602, 502.  $^1\text{H}$  NMR (300MHz,  $\text{CDCl}_3$ ): 7.17-7.25(m, 2H) 4.77(dd,  $J=4.2\text{Hz}, 13.0\text{Hz}$ , 2H) 3.65(dd,  $J=6.9\text{Hz}, 13.3\text{Hz}$ , 1H) 2.99(brs, 1H);  $^{13}\text{C}$  NMR (75MHz,  $\text{CDCl}_3$ ): 147.5, 129.6, 118.6, 113.6, 70.0, 47.8, 47.4. Mass ESI m/z (%): ( $M+1$ )=186; ( $M^{+3}$ )188.

(*1-chloro-3-(p-tolylamino)propan-2-ol*). (Table 4, entry 11) Crystalline Solid, mp  $68\text{-}70^\circ\text{C}$ ;  $R_f = 0.63$  (1:4 EtOAc/hexane); IR (KBr,  $\text{cm}^{-1}$ ): 3336, 2958, 2850, 1616, 1517, 1450, 1288, 707, 543.  $^1\text{H}$  NMR (300 MHz,  $\text{CDCl}_3$ ): 3.18(dd,  $J= 7.2\text{ Hz}, 15\text{Hz}$ , 1H); 3.34(dd,  $J=4.2\text{Hz}, 13.3\text{Hz}$ , 1H); 3.63(m,  $J=3.6\text{Hz}, 12.0\text{Hz}$ , 2H); 4.0(m, 1H).  $^{13}\text{C}$  NMR (75MHz,  $\text{CDCl}_3$ ): 145.6, 130.0, 127.8, 113.7, 76.8, 47.9, 20.5. Mass ESI m/z (%) ( $M^+ + 1$ )= 200.

(*1-chloro-3-(o-tolylamino)propan-2-ol*). (Table 4, entry 12) Viscous Liquid,  $^1\text{H}$  NMR (300MHz,  $\text{CDCl}_3$ ): 3.27(dd,  $J=7.2\text{Hz}, 13.2\text{Hz}$ , 1H); 3.43(dd,  $J=4.2\text{Hz}, 13.2\text{Hz}$ , 1H); 3.65(dd,  $J=4.5\text{Hz}, 12\text{Hz}$ , 2H); 4.13-4.17(m, 1H);

6.70(dd,  $J=7.2\text{Hz}, 16.5\text{Hz}$ , 2H); 7.06-7.16(m, 2H);  $^{13}\text{C}$  NMR (75MHz,  $\text{CDCl}_3$ ): 145.6, 130.6, 127.4, 123.1, 118.3, 110.6, 77.6, 69.9, 48.0.

(1-chloro-3-(naphthalen-1-ylamino)propan-2-ol) (Table 4, entry 13) Liquid,  $R_f=0.48$  (1:4 EtOAc/hexane)  $^1\text{H}$  NMR (300 MHz,  $\text{CDCl}_3$ ): 3.39(dd,  $J=7.2\text{Hz}, 12.9\text{Hz}$ , 1H); 3.53(brs, 1H, OH); 3.47 (m,  $J=2.4\text{Hz}, 4.8\text{Hz}$ , 1H); 3.7(m, 2H); 4.2(1H, NH);  $^{13}\text{C}$  NMR (75MHz,  $\text{CDCl}_3$ ): 142.8, 134.5, 128.9, 126.5, 126.1, 125.3, 124.0, 120.1, 118.9, 105.7, 69.8.

2-(1H-imidazol-1-yl)-2-phenylethanol) (Scheme 3) Liquid,  $R_f = 0.59$  (Pure EtOAc);  $^1\text{H}$  NMR (300 MHz,  $\text{CDCl}_3$ ): 7.43(m, 5H, Ar); 7.16(s, 1H); 6.9(s, 1H); 6.9(s, 1H); 4.9(s, 1H); 4.1(2H,  $\text{CH}_2$ ); 2.6(s, -OH).  $^{13}\text{C}$  NMR (75MHz,  $\text{CDCl}_3$ ): 141.0, 129.2, 128.9, 128.7, 128.5, 127.0, 126.0, 120.0. Mass ESI m/z (%)  $\text{M}^+=188$ ;  $\text{M}^++2=189$ .

(1-chloro-3-(1H-imidazo-1-yl)propan-2-ol), (Scheme 3) Viscous Liquid,  $R_f = 0.59$  (Pure EtOAc) IR (KBr  $\text{cm}^{-1}$ ): 3685, 3467, 2400, 1671, 1513, 1476, 1215, 1079.  $^1\text{H}$  NMR (300 MHz,  $\text{CDCl}_3$ ): 7.55(d, 1H); 6.97(m, 1H); 4.07(m, 2H); 3.55(dd,  $J = 4.5, 12.6$ , 1H), 3.48-3.36(m, 1H).  $^{13}\text{C}$  NMR (75 MHz,  $\text{CDCl}_3$ ): 136.5, 128.7, 121.0, 70.4, 50.3, 45.7. Mass ESI m/z (%)  $\text{M}^++1=161$ ;  $\text{M}^++3= 163(42\%)$ .



7.394  
7.386  
7.374  
7.367  
7.346  
7.340  
7.323  
7.316  
7.304  
7.297  
7.279  
7.272  
7.262  
7.253  
7.250  
7.237  
7.230  
7.222  
7.197  
7.194  
7.126  
7.119  
7.112  
7.094  
7.091  
7.072  
7.066  
7.059  
6.716  
6.703  
6.691  
6.678  
6.654  
6.595  
6.592  
6.556  
4.508  
4.494  
4.484  
4.470  
3.946  
3.932  
3.909  
3.895  
3.771  
3.748  
3.734  
3.711  
2.837  
-0.000

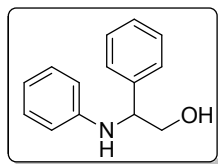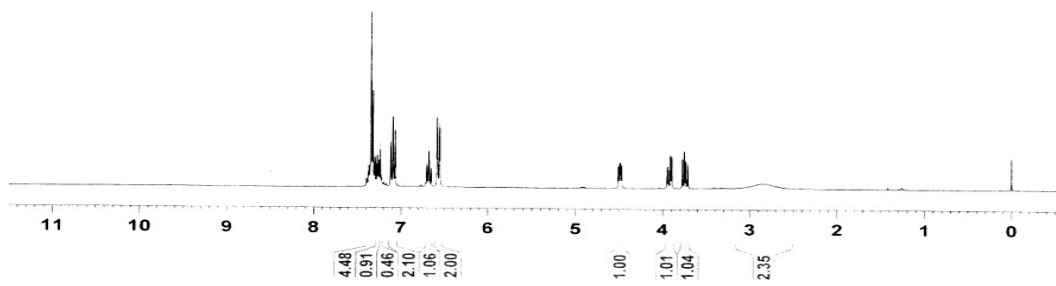

147.26  
140.22  
138.58  
128.36  
129.02  
128.84  
127.83  
126.96  
126.09  
118.24  
114.20  
77.65  
77.23  
76.80  
72.94  
67.46  
60.22

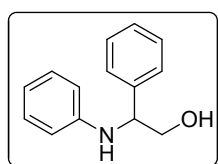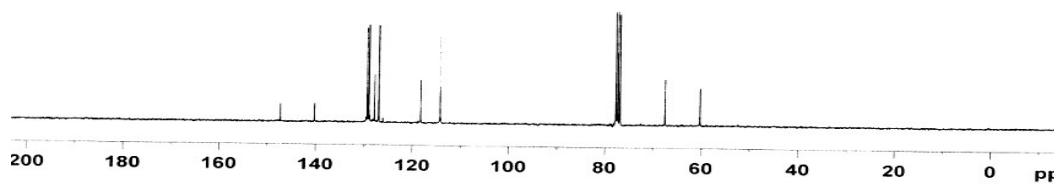

Figure S4. <sup>1</sup>H and <sup>13</sup>C Spectrum of 2-phenyl-2-(phenylamino)ethanol (Table 4, entry 1)

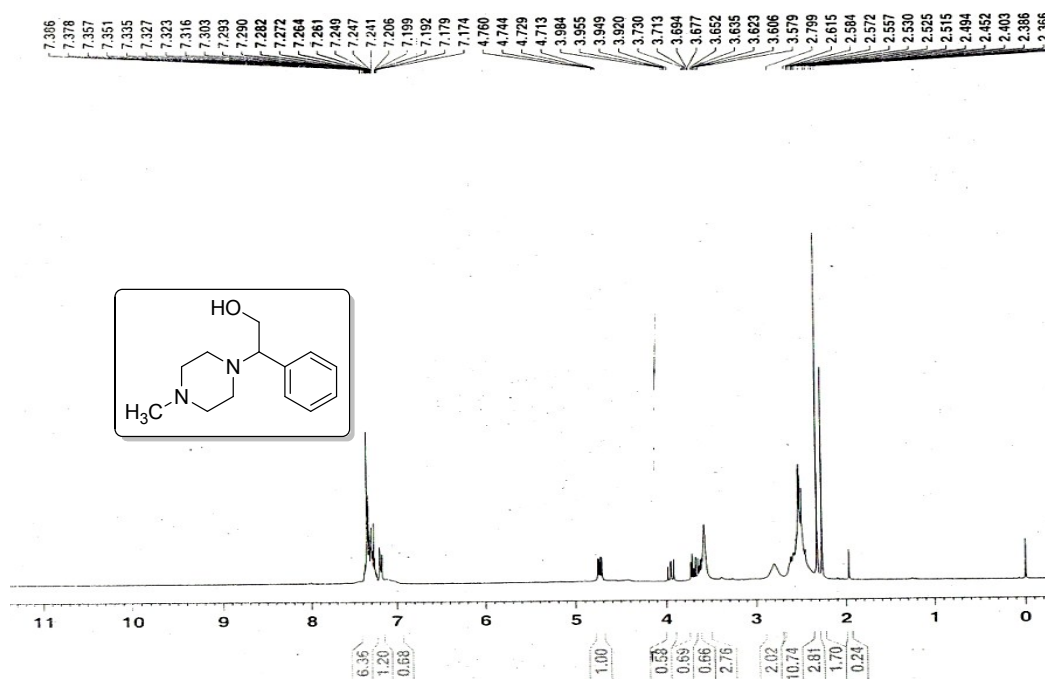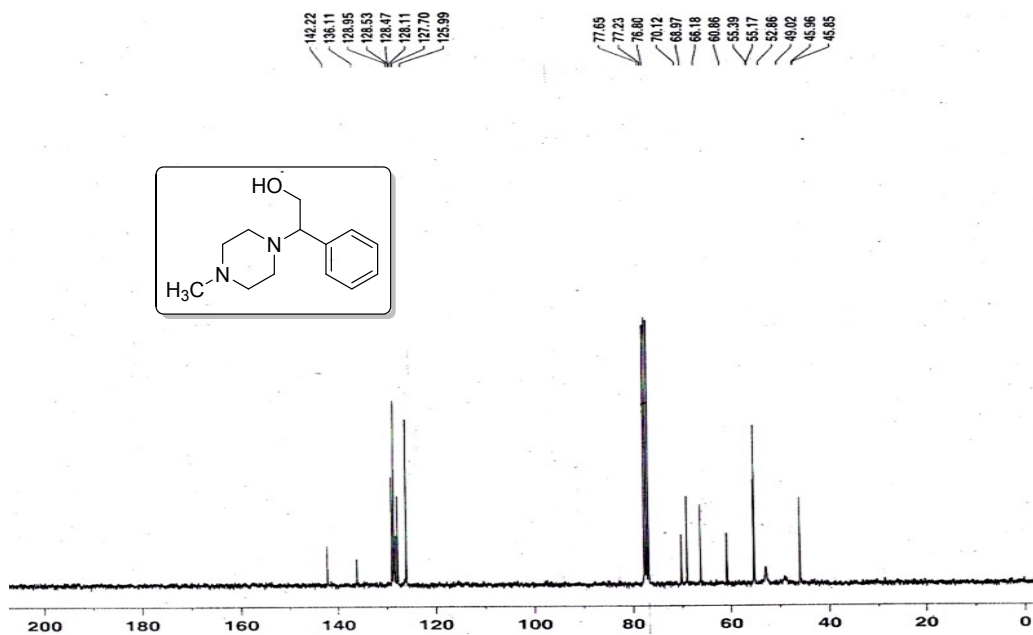

Figure S5. <sup>1</sup>H and <sup>13</sup>C Spectrum of 2-(4-methylpiperazine-1-yl)2-phenylethano (Table 4, entry 2)

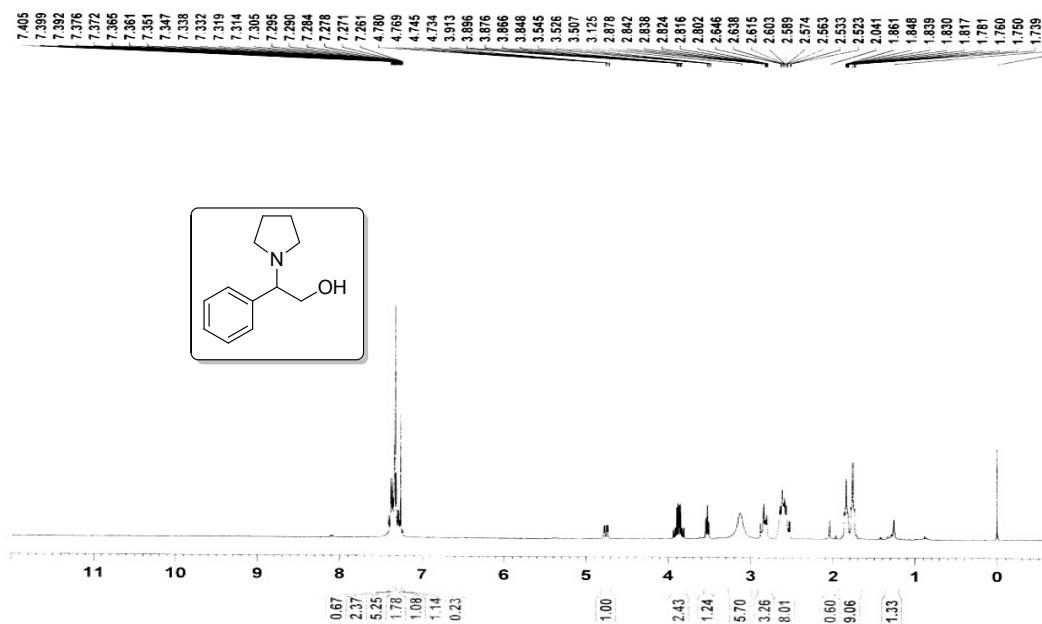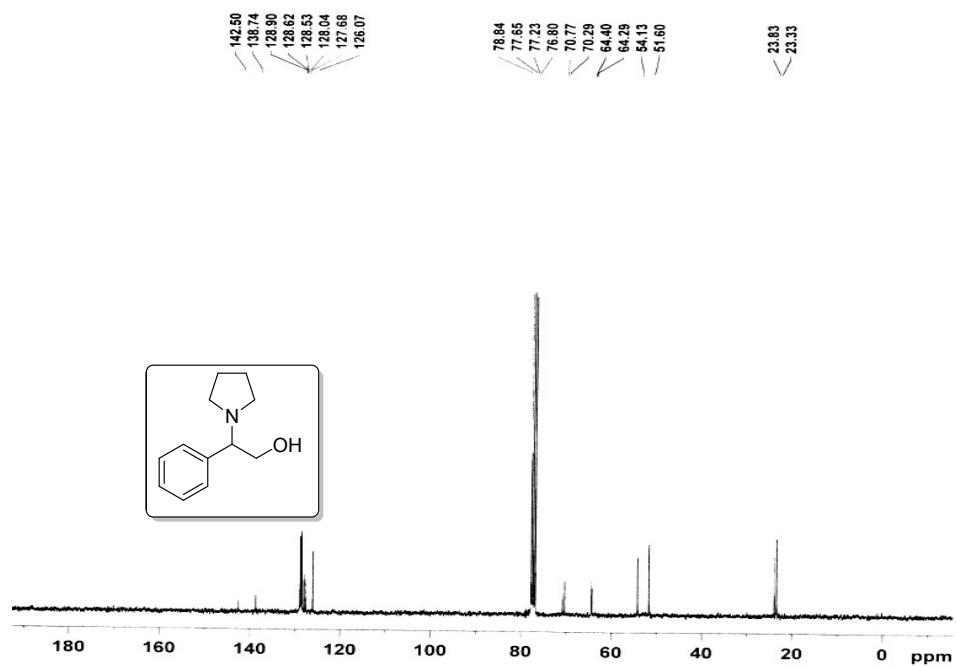

Figure S6. <sup>1</sup>H and <sup>13</sup>C Spectrum of (2-phenyl-2-(pyrrolidin-1-yl)ethanol) (Table 4, entry 3)

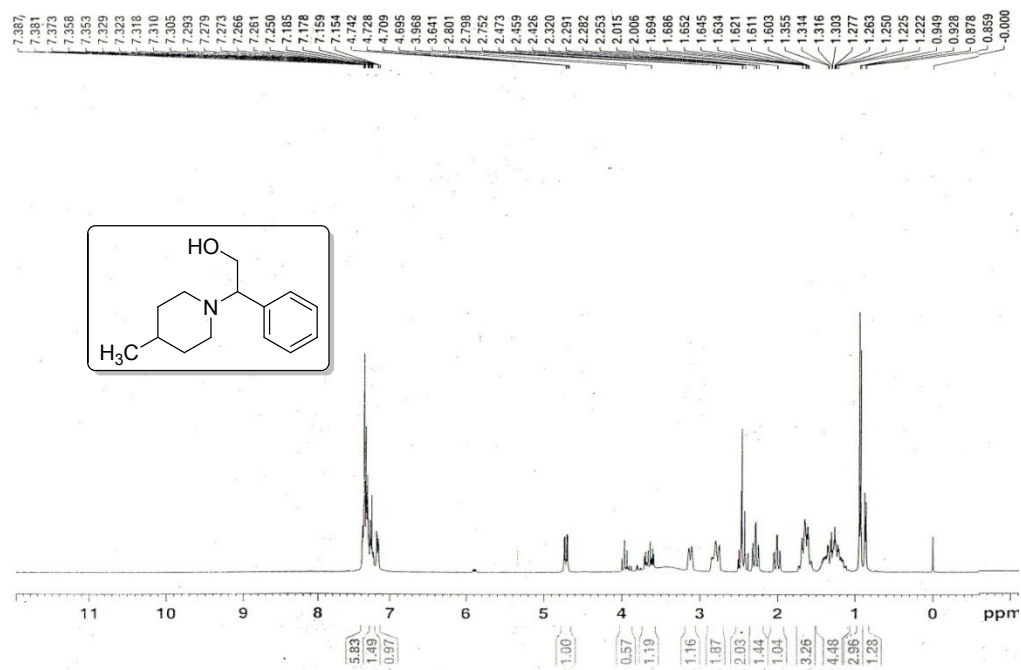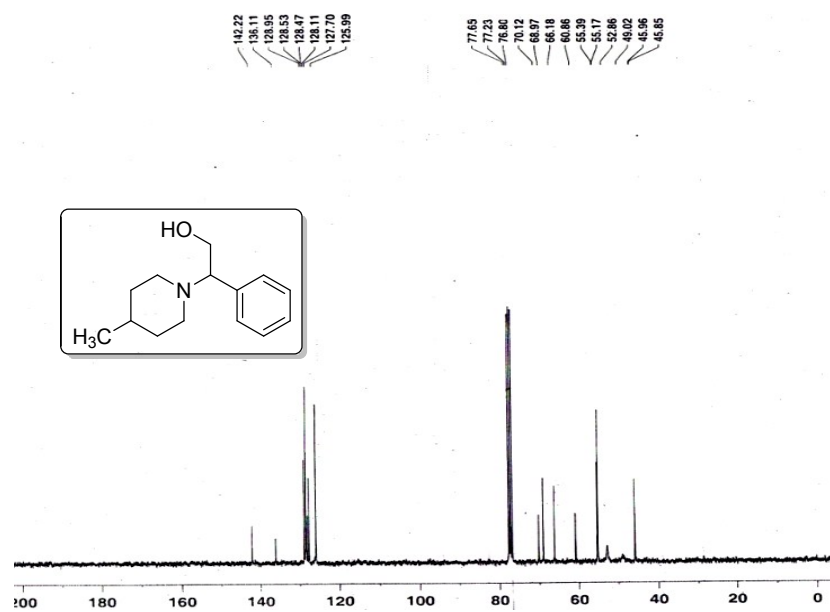

Figure S7. <sup>1</sup>H and <sup>13</sup>C Spectrum of 2-(4-methylpiperidin-1-yl)2-phenylethanol (Table 4, entry 4)

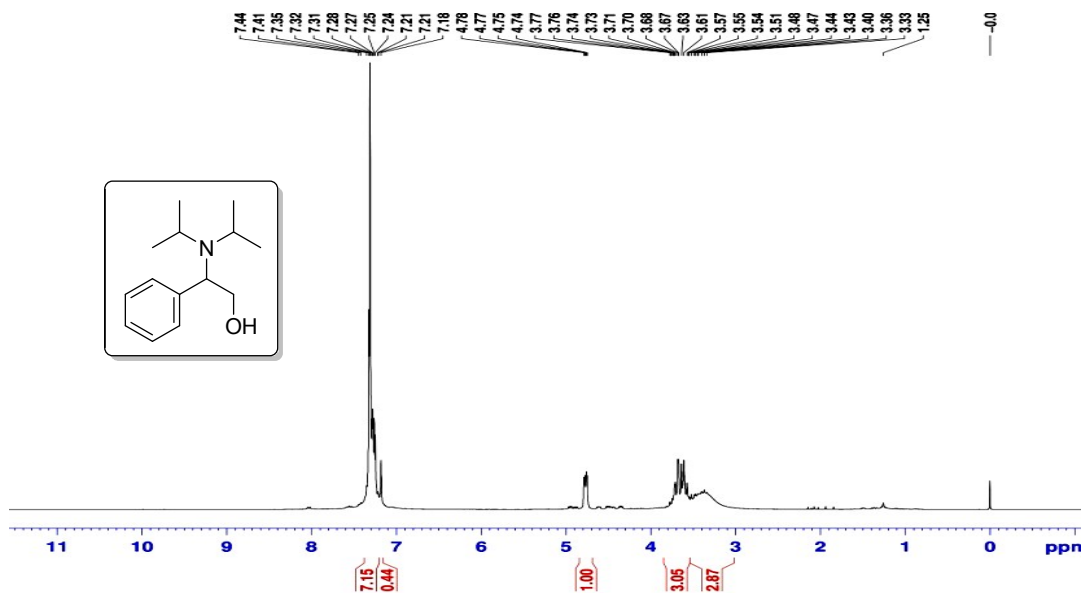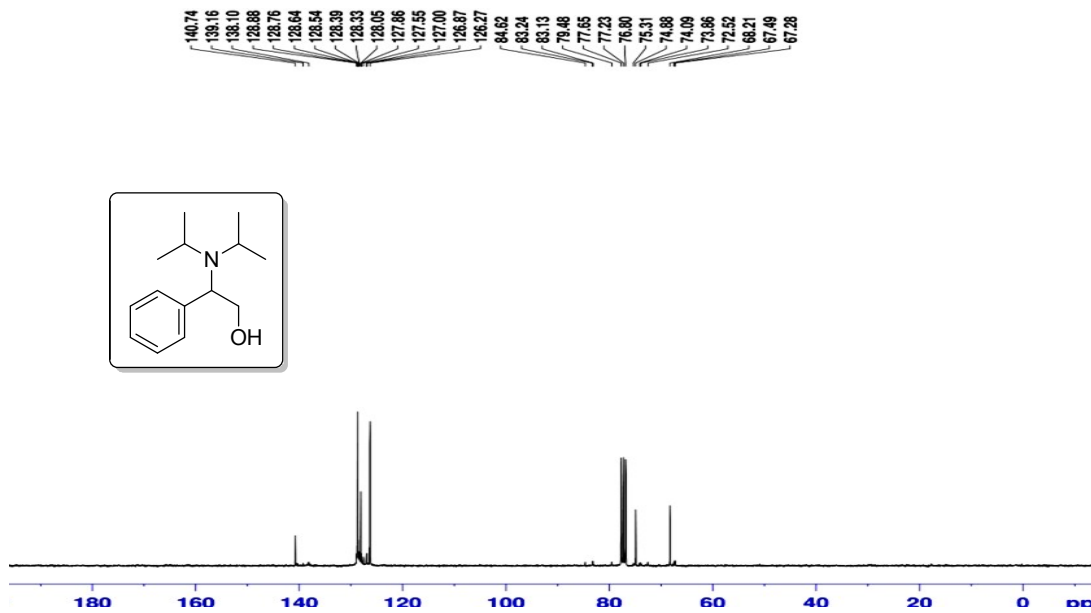

Figure S8. <sup>1</sup>H and <sup>13</sup>C Spectrum of (2-(dipropylamino)-2-phenylethanol) (Table 4, entry 5)

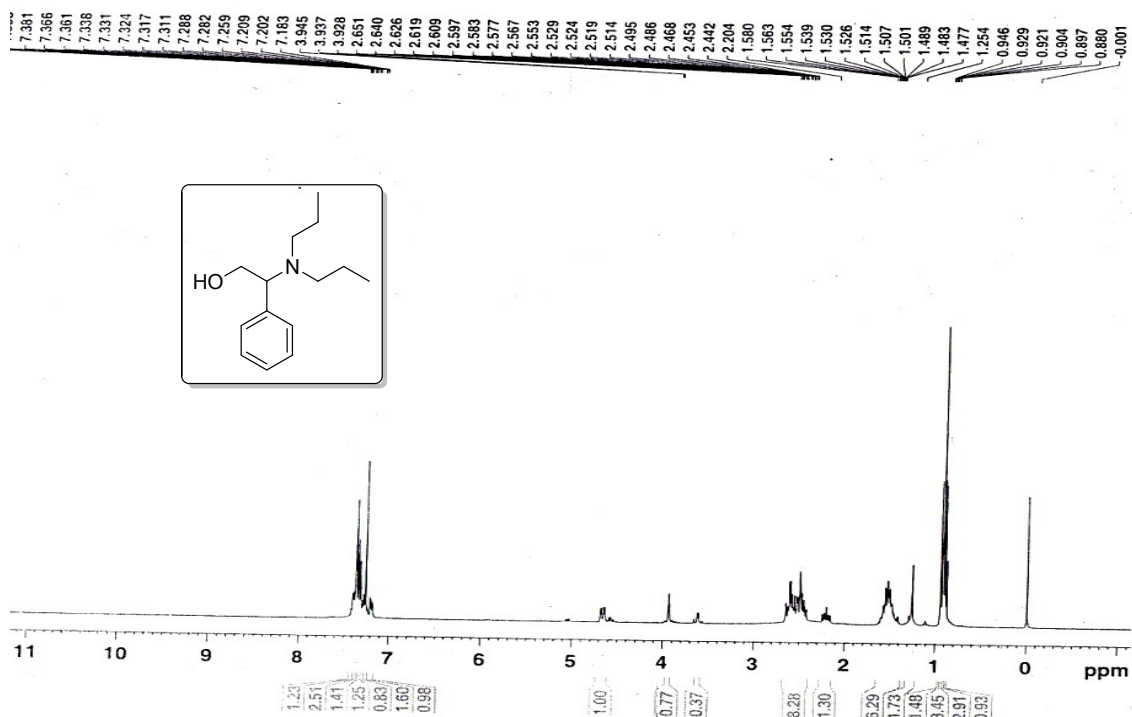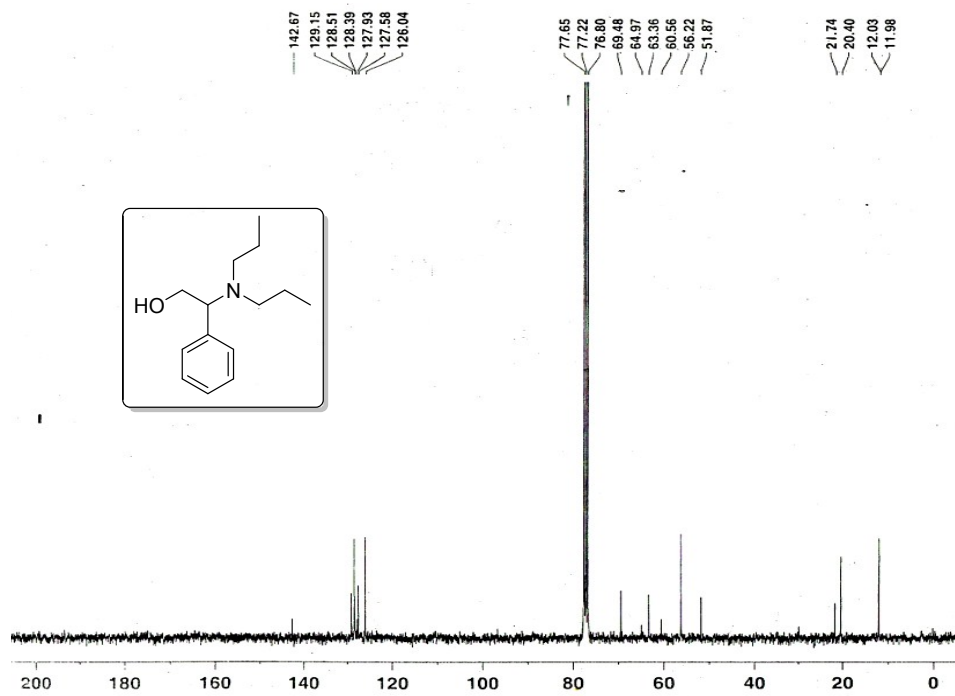

Figure S9. <sup>1</sup>H and <sup>13</sup>C Spectrum of 2-(dipropylamino)-2-phenylethanol (Table 4, entry 6)

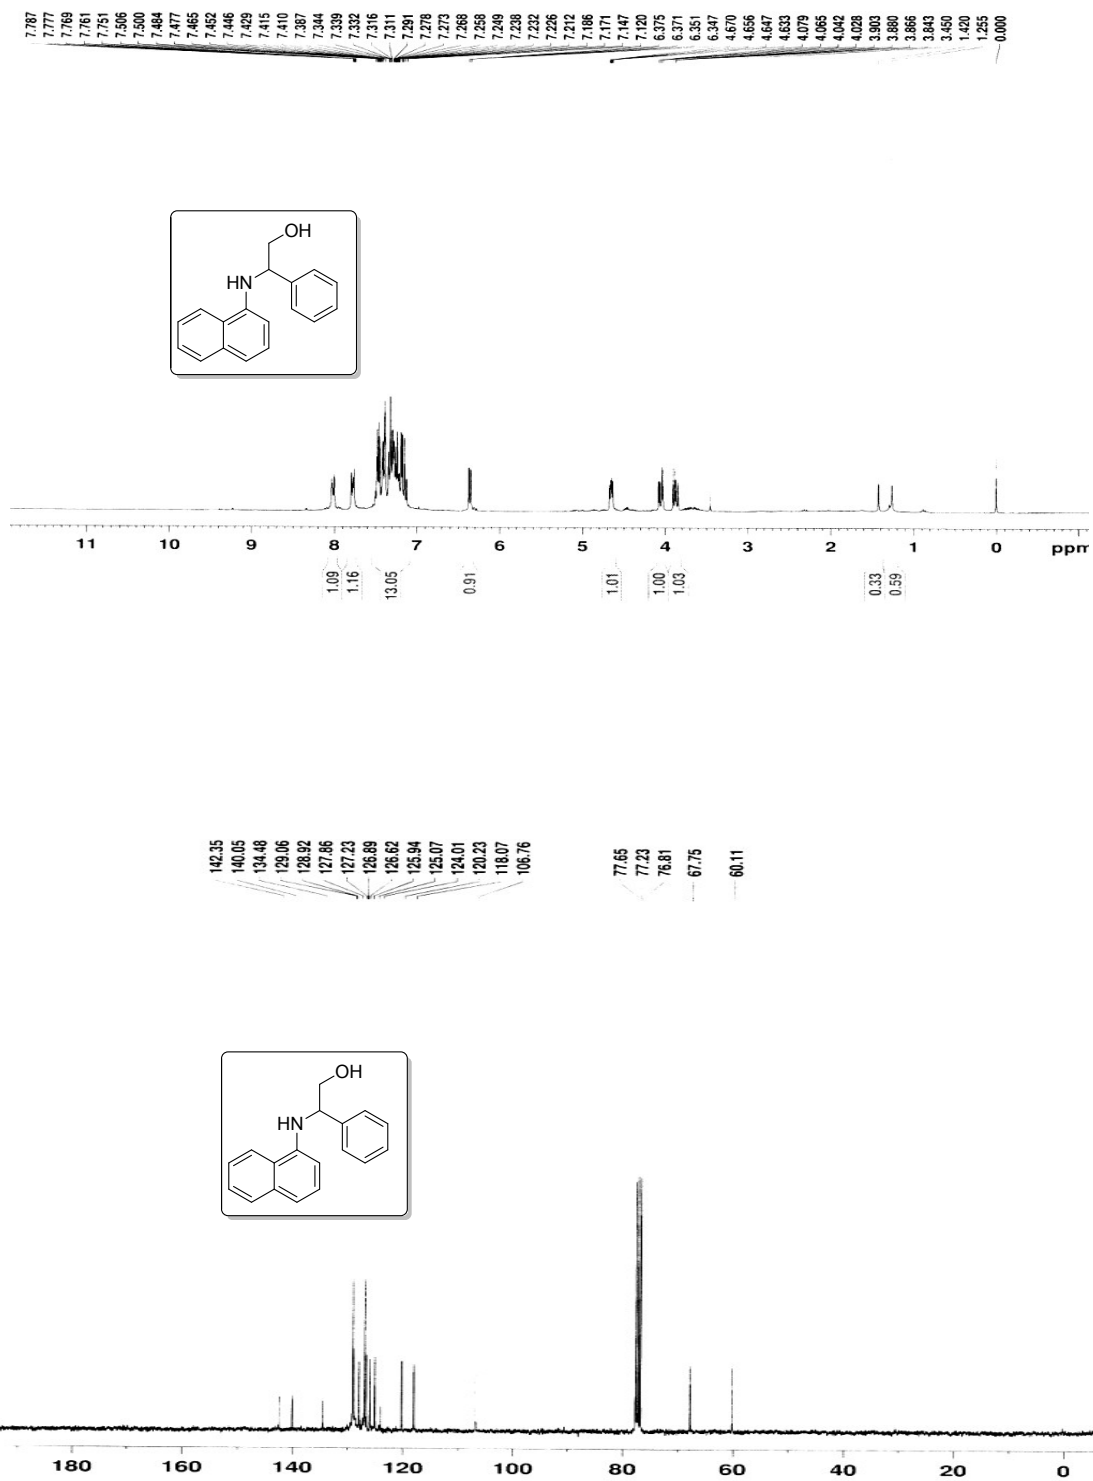

Figure S10. <sup>1</sup>H and <sup>13</sup>C Spectrum of 2-(naphthalene-1-ylamino)-2-phenylethanol (Table 4, entry 7)

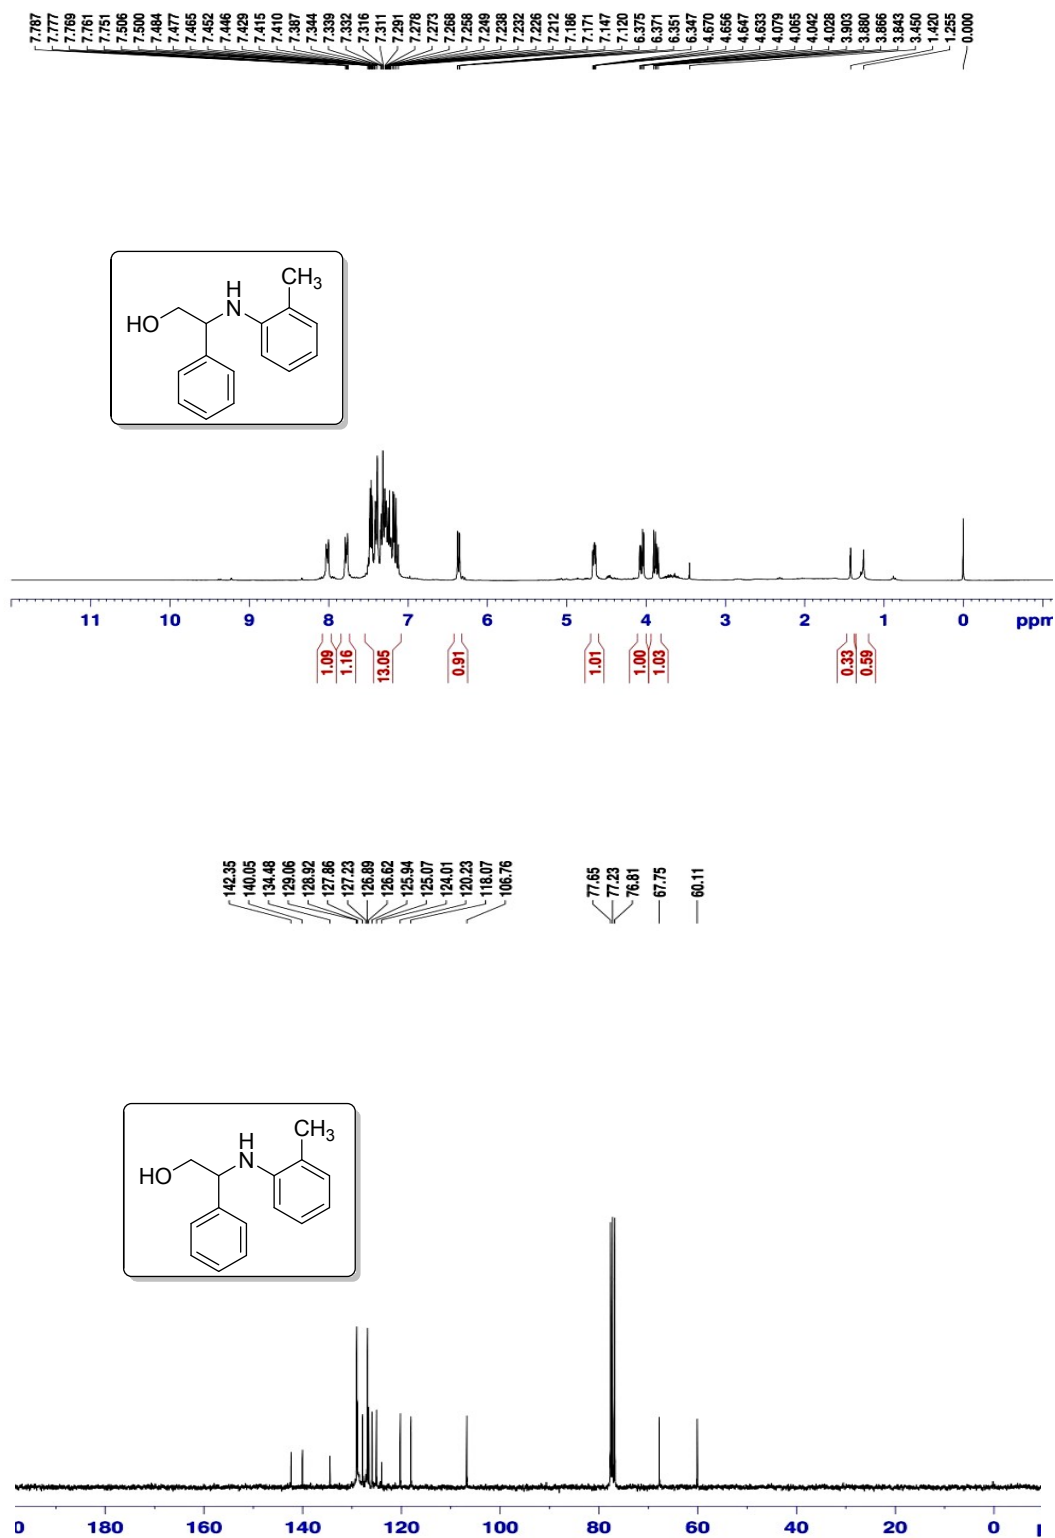

Figure S11. <sup>1</sup>H and <sup>13</sup>C Spectrum of (2-phenyl-2-(o-tolylamino)ethanol (Table 4, entry 8)



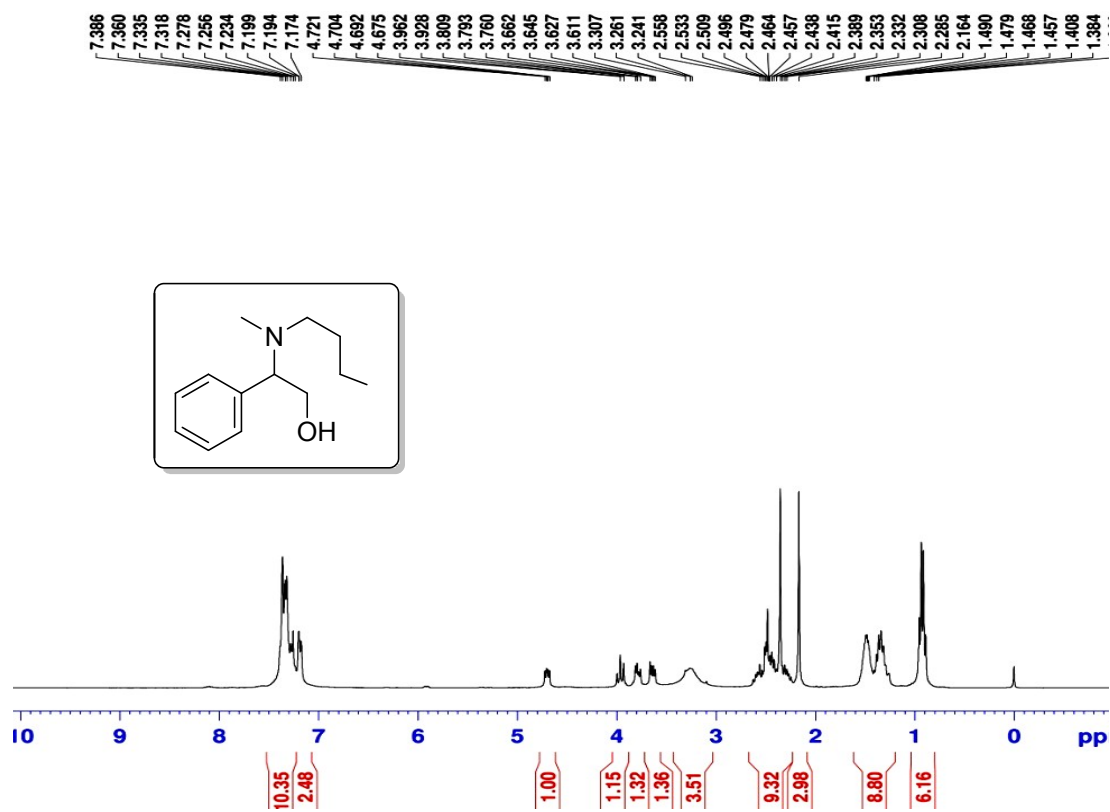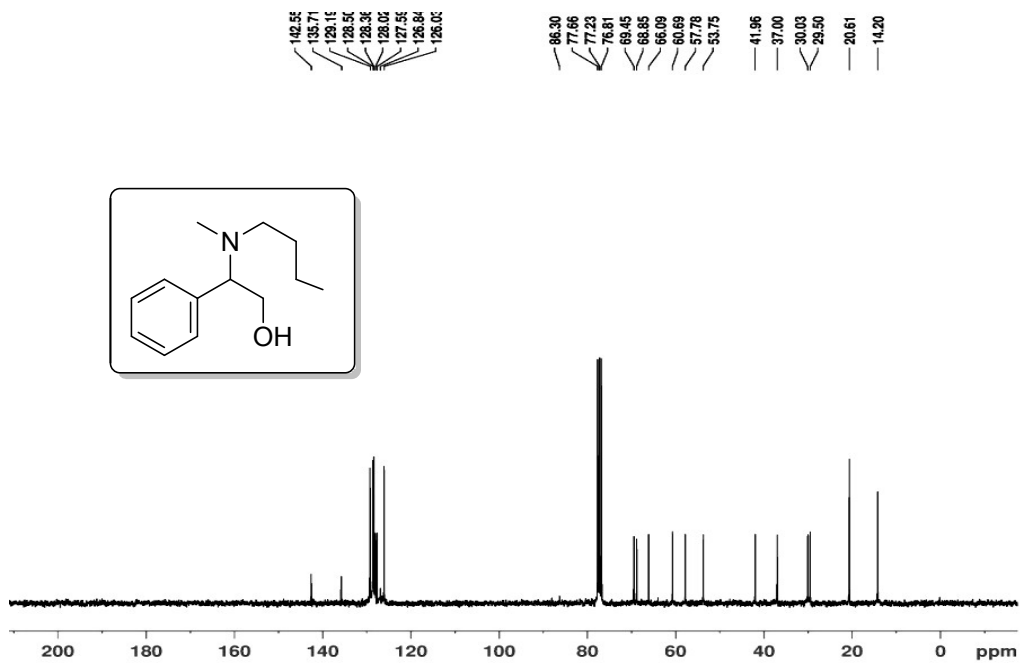

Figure S12. <sup>1</sup>H and <sup>13</sup>C Spectrum of 2-butyl (methyl) amino-2-phenylethanol (Table 4, entry 9)

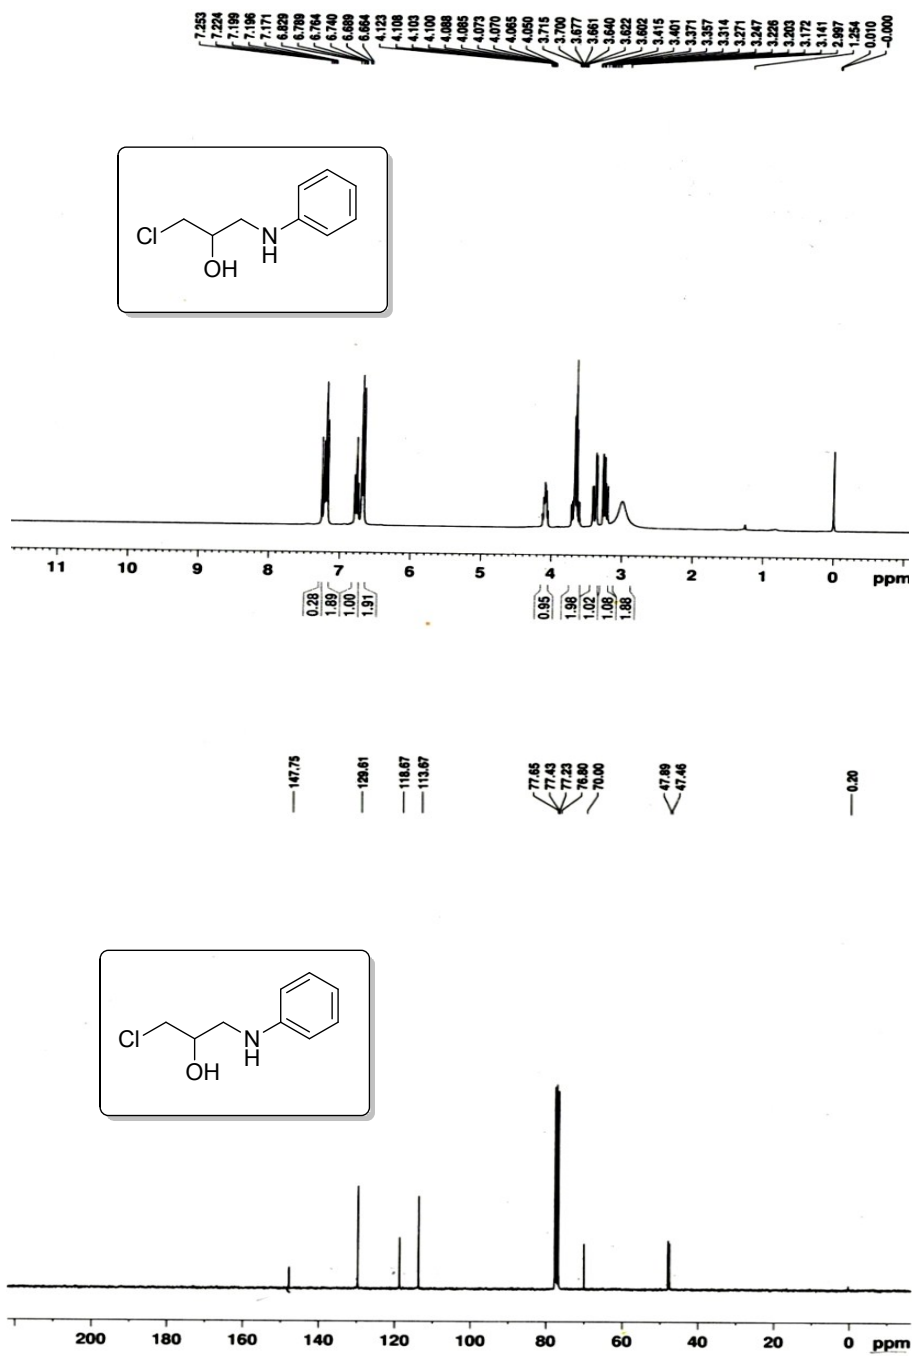

Figure S13. <sup>1</sup>H and <sup>13</sup>C Spectrum of 1-chloro-3-(phenylamino)propan-2-ol (Table 4, entry 10)

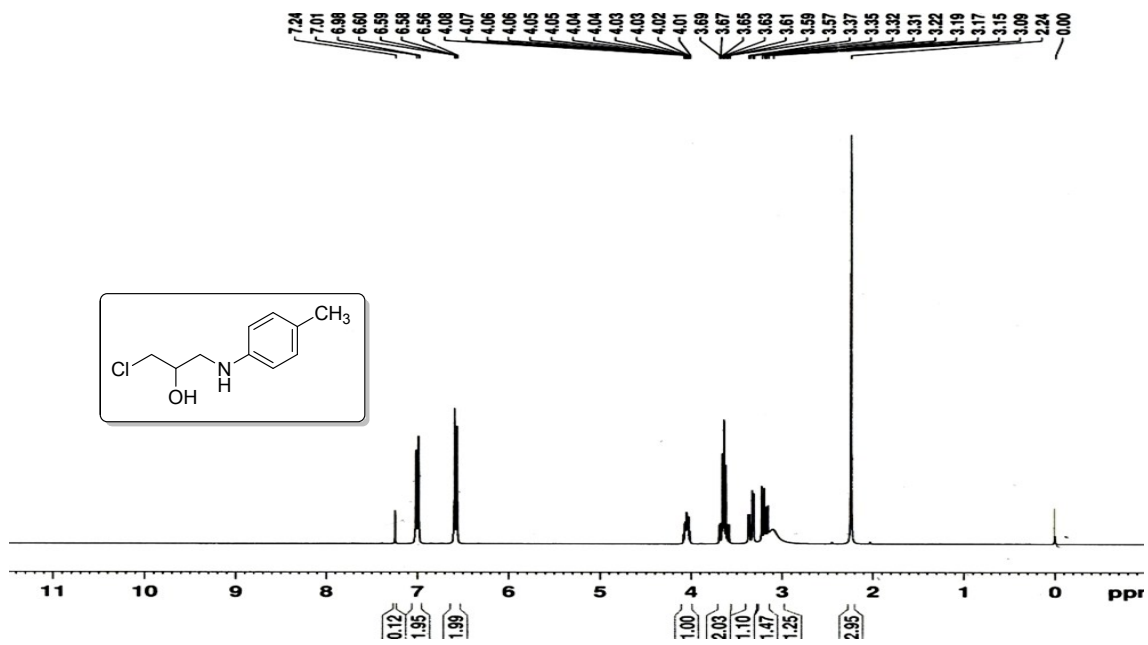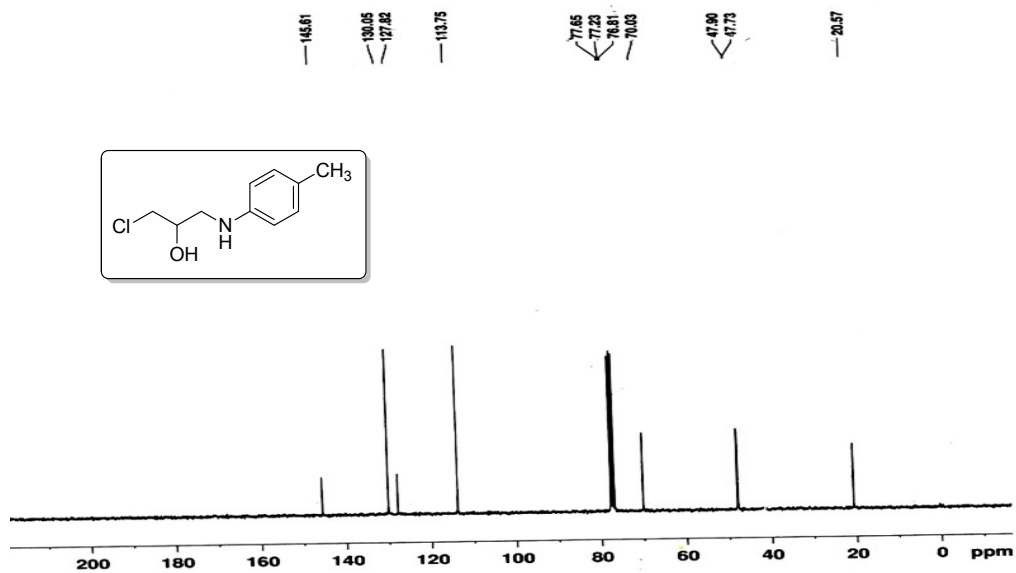

Figure S14. <sup>1</sup>H and <sup>13</sup>C Spectrum of *1-chloro-3-(p-tolylamino)propan-2-ol* (Table 4, entry 11)

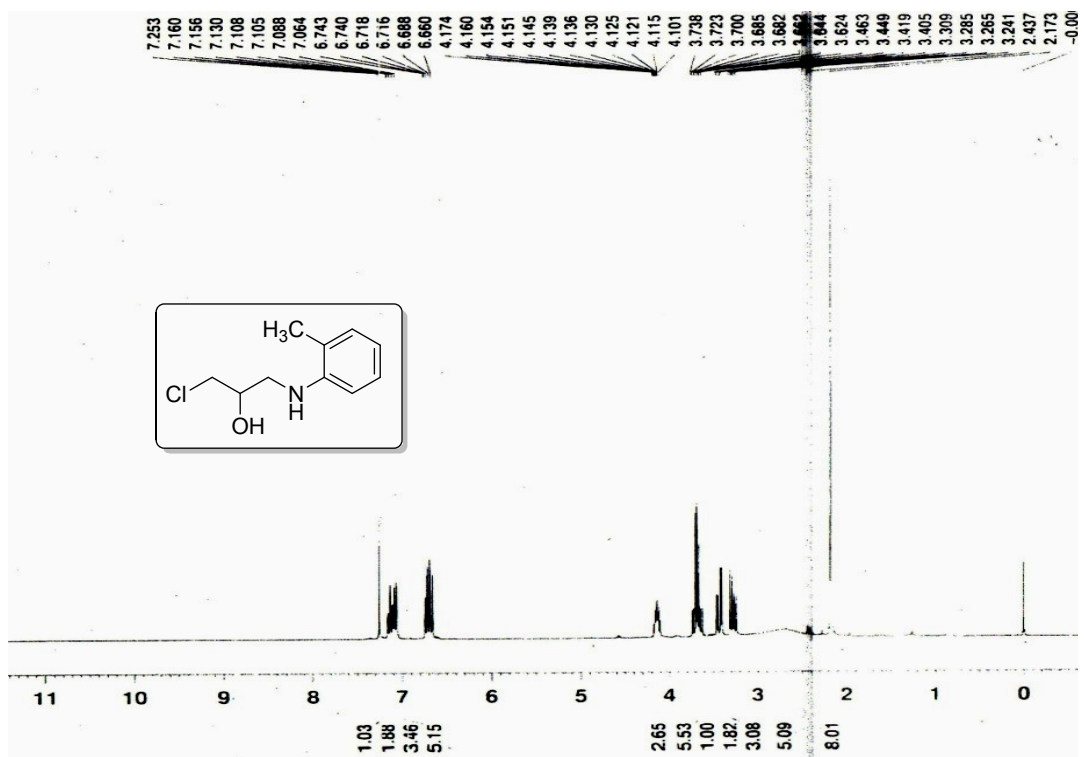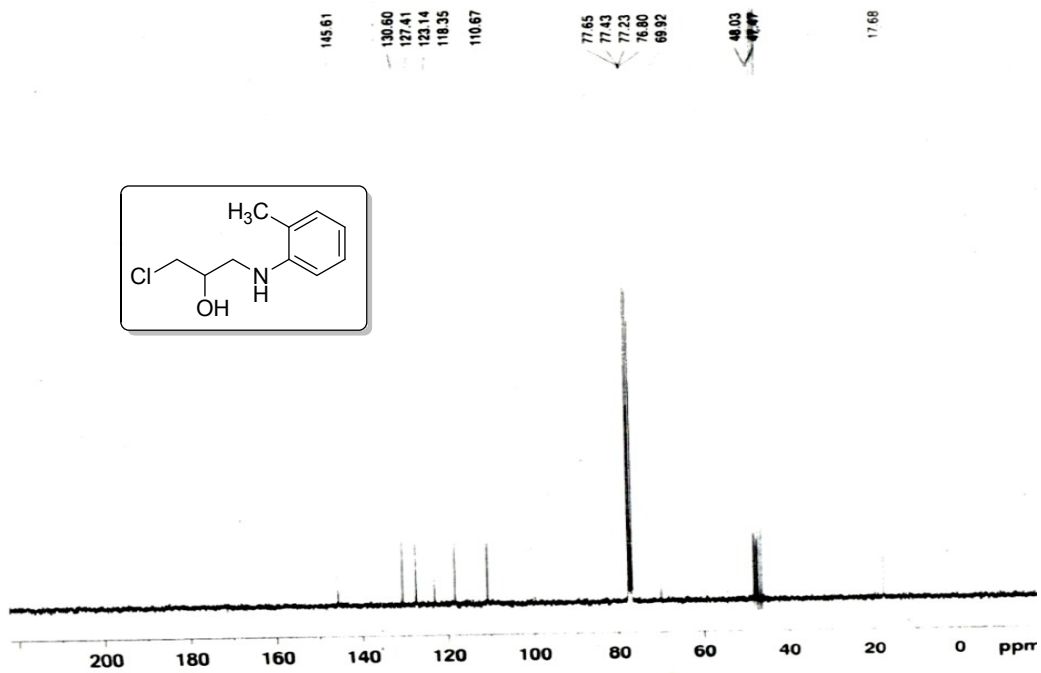

Figure S15.  $^1\text{H}$  and  $^{13}\text{C}$  Spectrum of (*1-chloro-3-(o-tolylamino)propan-2-ol*) (Table 4, entry

12)

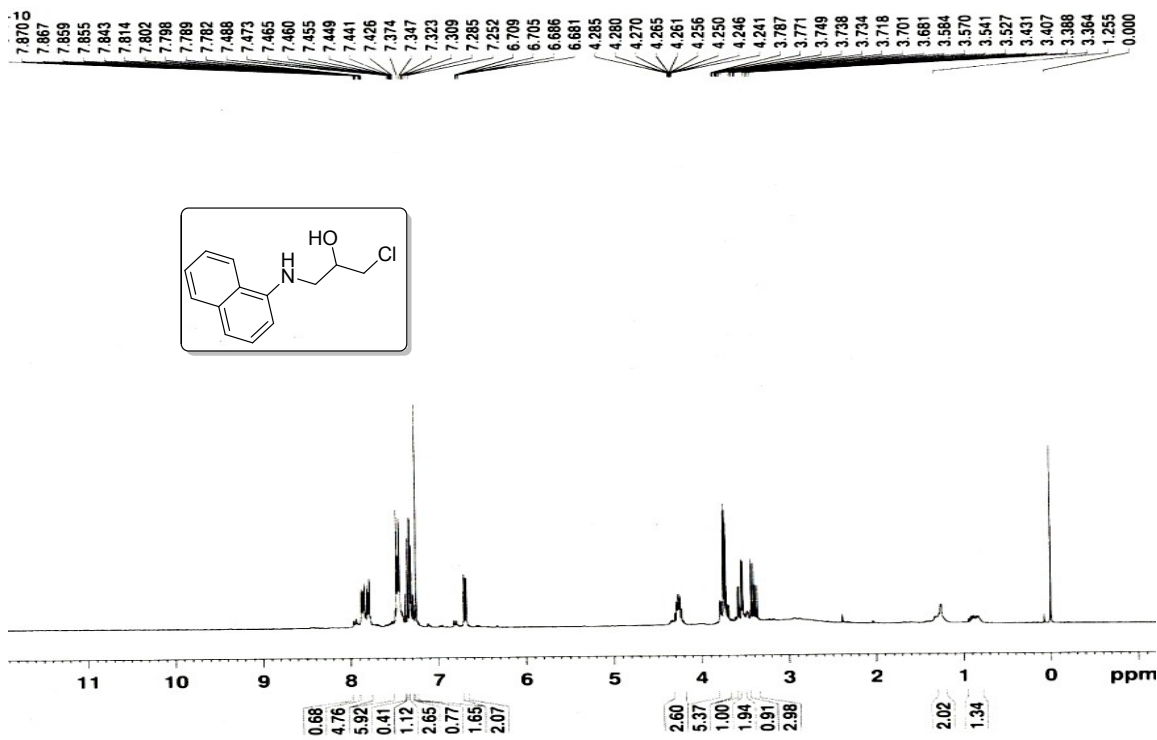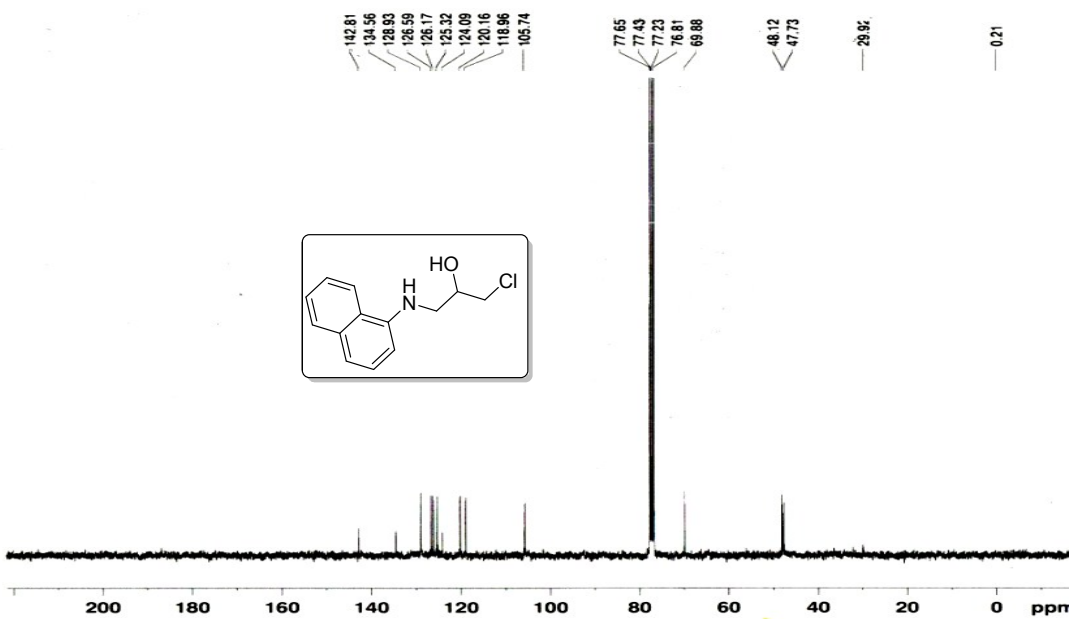

Figure S16. <sup>1</sup>H and <sup>13</sup>C Spectrum of *1-chloro-3-(naphthalen-1-ylamino)propan-2-ol* (Table 4, entry 13)

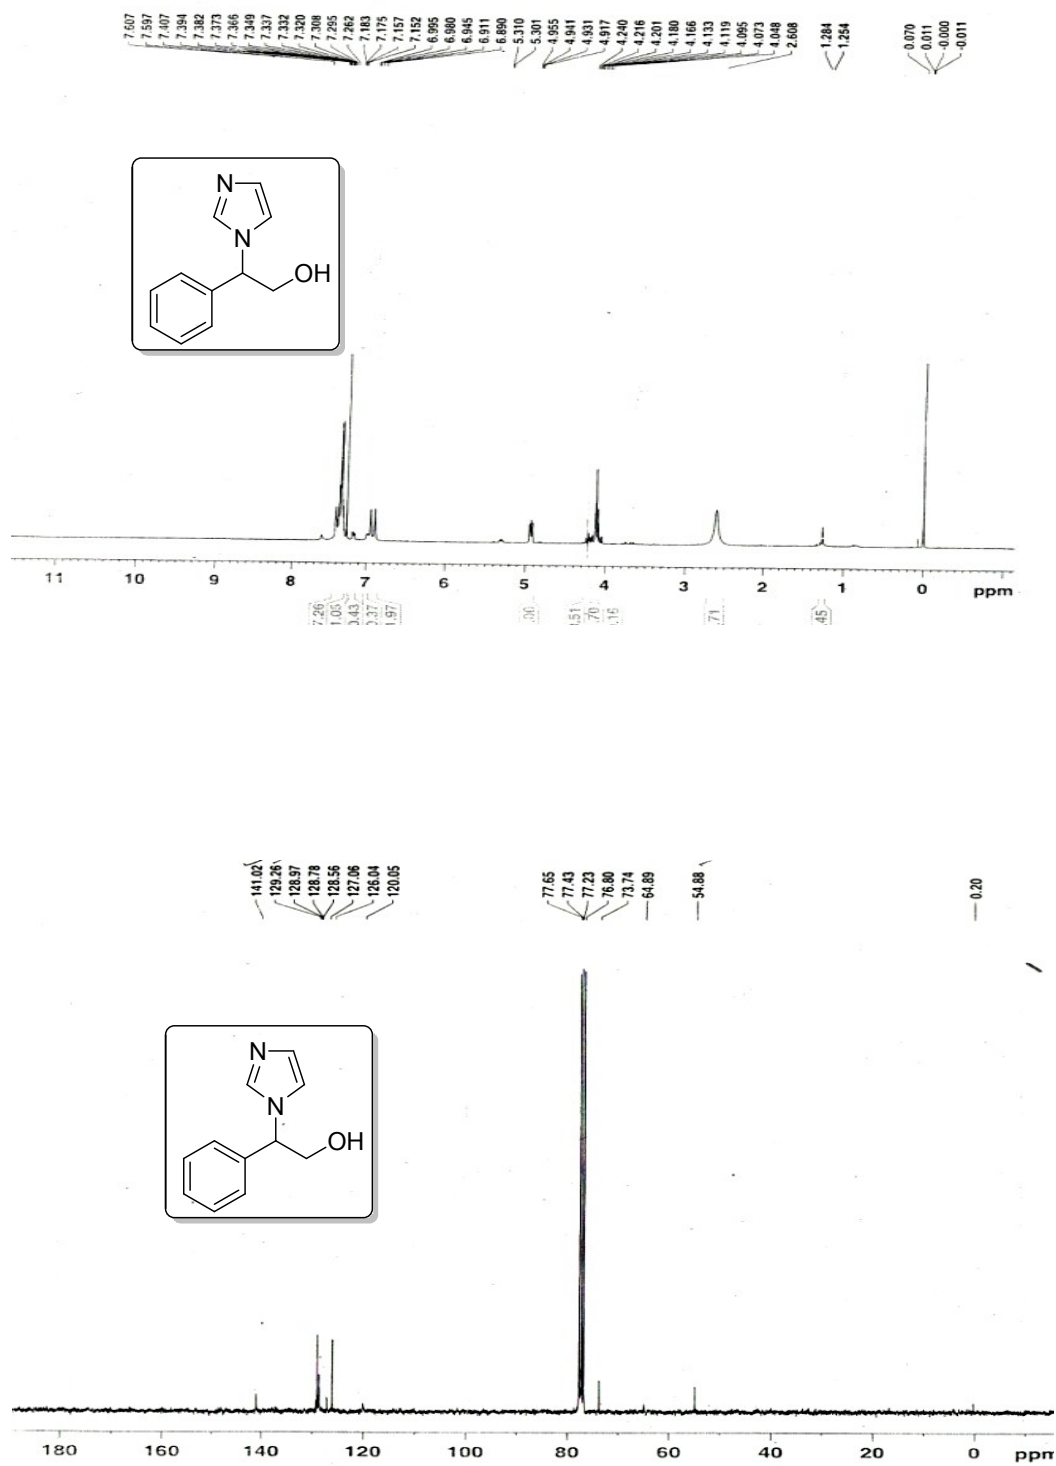

Figure S17. <sup>1</sup>H and <sup>13</sup>C Spectrum of 2-(1H-imidazol-1-yl)-2-phenylethanol (Scheme 3)
